# Supplementary material for: Ample Arsenite Bio-Oxidation Activity in Bangladesh Drinking Water Wells: A Bonanza for Bioremediation?
Source: MDPI journal article supplement (doi:10.3390/microorganisms7080246), 2019-08-08
Supplement: s1 [file s1]

*Supplementary material for*

# **Ample Arsenite Bio-Oxidation Activity in Bangladesh Drinking Water Wells: A Bonanza for Bioremediation?**

**Zahid Hassan<sup>1,2</sup>, Munawar Sultana<sup>3</sup>, Sirajul I. Khan<sup>3</sup>, Martin Braster<sup>1</sup>, Wilfred F.M. Röling<sup>1†</sup> and Hans V. Westerhoff<sup>1,4,5,\*</sup>**

<sup>1</sup> Department of Molecular Cell Biology, Faculty of Science, Vrije Universiteit Amsterdam, 1081 HV Amsterdam, The Netherlands

<sup>2</sup> Department of Genetic Engineering and Biotechnology, Jagannath University, Dhaka-1100, Bangladesh

<sup>3</sup> Department of Microbiology, University of Dhaka, Dhaka-1000, Bangladesh

<sup>4</sup> Manchester Centre for Integrative Systems Biology (MCISB), School of Chemical Engineering and Analytical Sciences (SCEAS), the University of Manchester, Manchester M13 9PL, UK

<sup>5</sup> Synthetic Systems Biology and Nuclear Organization, Swammerdam Institute for Life Sciences, University of Amsterdam, 1098 XH Amsterdam, The Netherlands

**Table S1.** PCR primer pairs and amplification conditions were used in this study.

| <i>Target gene</i>                           | <i>Primer name</i> | <i>Sequence (5'→3')*</i>   | <i>Product size (bp)</i> | <i>PCR conditions</i>                                                                                                                                         | <i>References</i> |
|----------------------------------------------|--------------------|----------------------------|--------------------------|---------------------------------------------------------------------------------------------------------------------------------------------------------------|-------------------|
| Bacterial 16S rRNA                           | 357F-GC**          | CCTACGGGAGGCAGCAG          | 626                      | 94°C for 5 minutes, followed by 35 cycles of 94°C for 30 seconds, 55°C for 30 seconds, and 72°C for 1 minute, with a final elongation at 72°C for 8 minutes.  | [28,29]           |
|                                              | 907r               | CCGTCAATTCMTTGGAGTTT       |                          |                                                                                                                                                               |                   |
| Arsenite oxidase ( <i>aioA</i> )             | AOX-F-A2           | TGCATCGTCGGCTGYGGNTAY      | 542                      | 94°C for 5 minutes, followed by 35 cycles of 94°C for 30 seconds, 57°C for 30 seconds, and 72°C for 1 minutes, with a final elongation at 72°C for 5 minutes. | [30]              |
|                                              | AOX-R-E2           | TTCGGAGTTATAGCCGGNCKRTRRTG |                          |                                                                                                                                                               |                   |
| Cloning for arsenite oxidase ( <i>aioA</i> ) | T7                 | TAATACGACTCACTATAGGG       | 682                      | 94°C for 5 minutes, followed by 35 cycles of 94°C for 30 seconds, 50°C for 30 seconds, and 72°C for 1 minutes, and a final elongation at 72°C for 8 minutes.  | [31]              |
|                                              | SP6                | ATTTAGGTGACACTATAG         |                          |                                                                                                                                                               |                   |

\*\*For DGGE analysis, this primer has the GC-clamp at the 5' end, CGCCCGCCGCGCGCGGGCGGGGCGGGGGCACGGGGGG [28].
